# Supplementary material for: The impact of maternal nutrition on offspring’s risk of non-communicable diseases in adulthood: a systematic review
Source: PubMed Central journal article supplement (PMC6790233; doi:10.7189/jogh.09.020405), 2019-12
Supplement: jogh-09-020405-s001.pdf [file jogh-09-020405-s001.pdf]

Appendix S1. PRISMA Checklist

| Section/topic             | # | Checklist item                                                                                                                                                                                                                                                                                              | Reported on page # |
|---------------------------|---|-------------------------------------------------------------------------------------------------------------------------------------------------------------------------------------------------------------------------------------------------------------------------------------------------------------|--------------------|
| <b>TITLE</b>              |   |                                                                                                                                                                                                                                                                                                             |                    |
| Title                     | 1 | Identify the report as a systematic review, meta-analysis, or both.                                                                                                                                                                                                                                         | 1                  |
| <b>ABSTRACT</b>           |   |                                                                                                                                                                                                                                                                                                             |                    |
| Structured summary        | 2 | Provide a structured summary including, as applicable: background; objectives; data sources; study eligibility criteria, participants, and interventions; study appraisal and synthesis methods; results; limitations; conclusions and implications of key findings; systematic review registration number. | 3                  |
| <b>INTRODUCTION</b>       |   |                                                                                                                                                                                                                                                                                                             |                    |
| Rationale                 | 3 | Describe the rationale for the review in the context of what is already known.                                                                                                                                                                                                                              | 5                  |
| Objectives                | 4 | Provide an explicit statement of questions being addressed with reference to participants, interventions, comparisons, outcomes, and study design (PICOS).                                                                                                                                                  | 6                  |
| <b>METHODS</b>            |   |                                                                                                                                                                                                                                                                                                             |                    |
| Protocol and registration | 5 | Indicate if a review protocol exists, if and where it can be accessed (e.g., Web address), and, if available, provide registration                                                                                                                                                                          | 8                  |

|                                    |    |                                                                                                                                                                                                                        |     |
|------------------------------------|----|------------------------------------------------------------------------------------------------------------------------------------------------------------------------------------------------------------------------|-----|
|                                    |    | information including registration number.                                                                                                                                                                             |     |
| Eligibility criteria               | 6  | Specify study characteristics (e.g., PICOS, length of follow-up) and report characteristics (e.g., years considered, language, publication status) used as criteria for eligibility, giving rationale.                 | 8-9 |
| Information sources                | 7  | Describe all information sources (e.g., databases with dates of coverage, contact with study authors to identify additional studies) in the search and date last searched.                                             | 8   |
| Search                             | 8  | Present full electronic search strategy for at least one database, including any limits used, such that it could be repeated.                                                                                          | S2  |
| Study selection                    | 9  | State the process for selecting studies (i.e., screening, eligibility, included in systematic review, and, if applicable, included in the meta-analysis).                                                              | 9   |
| Data collection process            | 10 | Describe method of data extraction from reports (e.g., piloted forms, independently, in duplicate) and any processes for obtaining and confirming data from investigators.                                             | 9   |
| Data items                         | 11 | List and define all variables for which data were sought (e.g., PICOS, funding sources) and any assumptions and simplifications made.                                                                                  | 9   |
| Risk of bias in individual studies | 12 | Describe methods used for assessing risk of bias of individual studies (including specification of whether this was done at the study or outcome level), and how this information is to be used in any data synthesis. | 10  |
| Summary measures                   | 13 | State the principal summary measures (e.g., risk ratio, difference in means).                                                                                                                                          | 10  |
| Synthesis of results               | 14 | Describe the methods of handling data and combining results of studies, if done, including measures of consistency (e.g., $I^2$ ) for each meta-analysis.                                                              | 10  |

| Section/topic                 | #  | Checklist item                                                                                                                                                                                           | Reported on page #      |
|-------------------------------|----|----------------------------------------------------------------------------------------------------------------------------------------------------------------------------------------------------------|-------------------------|
| Risk of bias across studies   | 15 | Specify any assessment of risk of bias that may affect the cumulative evidence (e.g., publication bias, selective reporting within studies).                                                             | 36-37                   |
| Additional analyses           | 16 | Describe methods of additional analyses (e.g., sensitivity or subgroup analyses, meta-regression), if done, indicating which were pre-specified.                                                         | -                       |
| <b>RESULTS</b>                |    |                                                                                                                                                                                                          |                         |
| Study selection               | 17 | Give numbers of studies screened, assessed for eligibility, and included in the review, with reasons for exclusions at each stage, ideally with a flow diagram.                                          | 11                      |
| Study characteristics         | 18 | For each study, present characteristics for which data were extracted (e.g., study size, PICOS, follow-up period) and provide the citations.                                                             | 13-19, 22-24, 26-28, 30 |
| Risk of bias within studies   | 19 | Present data on risk of bias of each study and, if available, any outcome level assessment (see item 12).                                                                                                | S3                      |
| Results of individual studies | 20 | For all outcomes considered (benefits or harms), present, for each study: (a) simple summary data for each intervention group (b) effect estimates and confidence intervals, ideally with a forest plot. | 13-19, 22-24, 26-28, 30 |
| Synthesis of results          | 21 | Present results of each meta-analysis done, including confidence intervals and measures of consistency.                                                                                                  | -                       |
| Risk of bias across studies   | 22 | Present results of any assessment of risk of bias across studies (see Item 15).                                                                                                                          | 36-37                   |
| Additional analysis           | 23 | Give results of additional analyses, if done (e.g., sensitivity or subgroup analyses, meta-regression [see Item 16]).                                                                                    | -                       |
| <b>DISCUSSION</b>             |    |                                                                                                                                                                                                          |                         |

|                     |    |                                                                                                                                                                                      |       |
|---------------------|----|--------------------------------------------------------------------------------------------------------------------------------------------------------------------------------------|-------|
| Summary of evidence | 24 | Summarize the main findings including the strength of evidence for each main outcome; consider their relevance to key groups (e.g., healthcare providers, users, and policy makers). | 31-39 |
| Limitations         | 25 | Discuss limitations at study and outcome level (e.g., risk of bias), and at review-level (e.g., incomplete retrieval of identified research, reporting bias).                        | 36-37 |
| Conclusions         | 26 | Provide a general interpretation of the results in the context of other evidence, and implications for future research.                                                              | 38-39 |
| <b>FUNDING</b>      |    |                                                                                                                                                                                      |       |
| Funding             | 27 | Describe sources of funding for the systematic review and other support (e.g., supply of data); role of funders for the systematic review.                                           | 2     |

## Appendix S2. Search Terms

### # ▲ Searches

- 1 Pregnancy/
- 2 exp Pregnancy Trimesters/
- 3 Pregnant Women/
- 4 preconception care/ or prenatal care/
- 5 Maternal Health/
- 6 (pregnant or pregnancy or gestational or preconcept\* or pre-concept\*  
or prepregnan\* or pre-pregnan\*).ti.
- 7 Postpartum Period/
- 8 Lactation/
- 9 Breast Feeding/
- 10 Bottle Feeding/
- 11 Infant Food/
- 12 Weaning/
- 13 (postnatal or post-natal or postpartum or post-partum).ti,ab.
- 14 (lactation or lactating or breastfeed\* or breast feed\* or breast fed or  
breastfed or bottle feed\* or bottle fed or bottlefeed or bottlefed or

infant feeding or weaning or weaned).ti.

15 1 or 2 or 3 or 4 or 5 or 6 or 7 or 8 or 9 or 10 or 11 or 12 or 13 or 14 or 15

16 Weight Gain/

17 overweight/ or obesity/ or obesity, morbid/

18 Overnutrition/

19 (obes\* or overweight or adipos\*).ti.

20 Weight Loss/

21 Thinness/

22 malnutrition/ or starvation/

23 exp Deficiency Diseases/

24 exp \*Diet/

25 exp \*Food/

26 Sodium Chloride, Dietary/

27 exp Drinking Behavior/

28 exp \*Beverages/

(diet or nutrition\* or undernutrition or malnutrition or starvation or  
29 famine or underweight or thin or slim).ti.

30 ((energy or calor\* or food or drink\*) adj2 (intake or consumption)).ti,ab.

31 ((healthy or healthful) adj eating).ti,ab.

- 32 (fruit? or vegetable? or salt or sodium or vitamin? or mineral? or  
nutrient? or micronutrient?).ti.
- 33 ((fruit? or vegetable? or salt or sodium or vitamin? or mineral? or  
nutrient? or micronutrient?) adj3 (intake or consum\* or diet\*)).ti,ab.
- 34 ((vitamin? or mineral? or diet\* or nutrition\* or nutrient? or  
micronutrient?) adj3 (deficiency or deficient)).ti,ab.
- 35 (artificial sweetener? or artificial sweetening or sugar substitute? or  
sweetening agent? or corn syrup? or fructose).ti,ab.
- 36 (alcohol\* or drink\*).ti.
- 37 (alcohol\* adj3 (drink\* or factor\* or pattern\* or habit\* or consum\* or  
unhealthy)).ti,ab.
- 38 (((carbonated or sugar\* or sweetend or soft) adj2 (drink? or bevarage?))  
or soda? or fruit juice?).ti,ab.
- 39 Body Mass Index/
- 40 (body mass or bmi).ti.
- 41 16 or 17 or 18 or 19 or 20 or 21 or 22 or 23 or 24 or 25 or 26 or 27 or 28  
or 29 or 30 or 31 or 32 or 33 or 34 or 35 or 36 or 37 or 38 or 39 or 40
- 42 15 and 41
- 42 ((maternal or mother\*) adj2 (weight or bodyweight or overweight or  
obes\* or adipos\* or bmi or body mass or underweight or undernutrition  
or malutrition or starvation or thin\* or slim or excess weight or excess  
fat)).ti,ab.

((pregnant or pregnancy or prepregnan\* or pre-pregnan\* or gestational)  
43 adj2 (weight or bodyweight or overweight or obes\* or adipos\* or bmi or  
body mass or underweight or undernutrition or malnutrition or  
starvation or thin\* or slim or excess weight or excess fat)).ti,ab.

((preconcept\* or pre-concept\*) adj2 (weight or bodyweight or  
44 overweight or obes\* or adipos\* or bmi or body mass or underweight or  
undernutrition or malnutrition or starvation or thin\* or slim or excess  
weight or excess fat)).ti,ab.

((prenatal or pre-natal or prepartal or prepartum or pre-partal or pre-  
45 partum or antenatal or antepartum or ante-natal or ante-partum) adj2  
(weight or bodyweight or overweight or obes\* or adipos\* or bmi or body  
mass or underweight or undernutrition or malnutrition or starvation or  
thin\* or slim or excess weight or excess fat)).ti,ab.

46 ((maternal or mother\*) adj2 (diet\* or nutrition\*)).ti,ab.

((pregnant or pregnancy or prepregnan\* or pre-pregnan\* or gestational)  
47 adj2 (diet\* or nutrition\*)).ti,ab.

48 ((preconcept\* or pre-concept\*) adj2 (diet\* or nutrition\*)).ti,ab.

((prenatal or pre-natal or prepartal or prepartum or pre-partal or pre-  
49 partum or antenatal or antepartum or ante-natal or ante-partum) adj2  
(diet\* or nutrition\*)).ti,ab.

50 maternal nutritional physiological phenomena/ or prenatal nutritional  
physiological phenomena/



51 ((postnatal or post-natal or postpartum or post-partum) adj2 (weight or  
bodyweight or overweight or obes\* or adipos\* or bmi or body mass or  
underweight or undernutrition or malnutrition or starvation or thin\* or  
slim or excess weight or excess fat)).ti,ab.

52 ((lactation or lactating or breastfeed\* or breast feed\* or breast fed or  
breastfed or bottle feed\* or bottle fed or bottlefeed or bottlefed or  
infant feeding or weaning or weaned) adj2 (weight or bodyweight or  
overweight or obes\* or adipos\* or bmi or body mass or underweight or  
undernutrition or malnutrition or starvation or thin\* or slim or excess  
weight or excess fat)).ti,ab.

53 ((postnatal or post-natal or postpartum or post-partum) adj2 (diet\* or  
nutrition\*)).ti,ab.

54 ((lactation or lactating or breastfeed\* or breast feed\*) adj2 (diet\* or  
nutrition\*)).ti,ab.

55 Infant Nutritional Physiological Phenomena/

56 42 or 43 or 44 or 45 or 46 or 47 or 48 or 49 or 50 or 51 or 52 or 53 or 54  
or 55

57 exp child/ or infant/

58 (infant? or infancy or child\* or preschool\* or pre-school\* or toddler\* or  
pediatric\* or paediatric or juvenile or offspring).ti.

59 57 or 58

60 overweight/ep or obesity, morbid/ep

- 61 exp Body Composition/
- 62 growth/ or body size/ or body height/ or body weight/ or birth weight/
- 63 Blood Pressure/
- 64 Hypertension/
- 65 Cholesterol/bl [Blood]
- 66 Triglycerides/bl [Blood]
- 67 Lipids/bl [Blood]
- 68 exp Hyperlipidemias/
- 69 Blood Glucose/
- 70 Insulin/bl [Blood]
- 71 Puberty, Precocious/
- 72 Mortality/
- 73 Asthma/
- 74 exp Pulmonary Disease, Chronic Obstructive/
- 75 exp \*Neoplasms/
- 76 (obes\* or overweight\* or bmi or body mass).ti.  
  
(growth or height or body composition or body fat or body weight or  
77 bodyweight or weight gain or muscle mass).ti.
- 78 (blood pressure or hypertens\*).ti.
- 79 ((blood or plasma or serum) adj2 (lipid\* or cholesterol or

triglyceride\*)).ti,ab.

80 (hypercholesterol?emi\* or hyperlipid?emi?).ti.

81 (lipid\* or cholesterol or triglyceride\*).ti.

82 ((blood or plasma or serum) adj2 glucose).ti,ab.

83 (insulin adj2 (sensitivity or tolerance or growth factor)).ti,ab.

84 (asthma\* or ((lung or respiratory or pulmonary) adj function)).ti,ab.

85 (chronic adj2 (lung or pulmonary or bronchitis)).ti,ab.

(cancer? or neoplas\* or carcinoma? or leukaemia? or leukemia? or  
86 lymphoma? or sarcoma? or malignanc\*).ti.

87 (mortality or death?).ti.

60 or 61 or 62 or 63 or 64 or 65 or 66 or 67 or 68 or 69 or 70 or 71 or 72

88 or 73 or 74 or 75 or 76 or 77 or 78 or 79 or 80 or 81 or 82 or 83 or 84 or  
85 or 86 or 87

89 56 and 59 and 88

90 Pediatric Obesity/

91 Child Mortality/ or Infant Mortality/

92 Prenatal Exposure Delayed Effects/

((infant? or infancy or child\* or preschool\* or pre-school\* or toddler\* or

93 pediatric\* or paediatric or juvenile or offspring) adj2 (obes\* or  
overweight)).ti,ab.

((infant? or infancy or child\* or preschool\* or pre-school\* or toddler\* or  
94 pediatric\* or paediatric or juvenile or offspring) adj5 (lipid\* or cholesterol  
or triglyceride\* or hypercholesterol?emi\* or hyperlipid?emi?)).ti,ab.

((infant? or infancy or child\* or preschool\* or pre-school\* or toddler\* or  
95 pediatric\* or paediatric or juvenile or offspring) adj5 (blood glucose or  
insulin)).ti,ab.

((infant? or infancy or child\* or preschool\* or pre-school\* or toddler\* or  
96 pediatric\* or paediatric or juvenile or offspring) adj5 (blood pressure or  
hypertens\*)).ti,ab.

((infant? or infancy or child\* or preschool\* or pre-school\* or toddler\* or  
97 pediatric\* or paediatric or juvenile or offspring) adj5 (growth or height or  
body composition or body fat or body weight or bodyweight or weight  
gain or muscle mass)).ti,ab.

((postnatal or post-natal or postpart\* or post-part\* or "catch up") adj2  
98 (growth or weight gain)).ti,ab.

99 ((early or precocious or premature) adj2 puberty).ti,ab.

((infant? or infancy or child\* or preschool\* or pre-school\* or toddler\* or  
100 pediatric\* or paediatric or juvenile or offspring) adj2 (mortality or  
death?)).ti,ab.

((infant? or infancy or child\* or preschool\* or pre-school\* or toddler\* or  
101 pediatric\* or paediatric or juvenile or offspring) adj5 (cancer? or  
neoplas\* or carcinoma? or leukaemia? or leukemia? or lymphoma? or  
sarcoma? or malignanc\*)).ti,ab.

102 90 or 91 or 92 or 93 or 94 or 95 or 96 or 97 or 98 or 99 or 100 or 101

103 42 and 102

105 exp animals/ not humans.sh.

106 (rat or rats or mouse or mice or murine or rodent?).ti.

107 105 and 106

108 103 not 107

### Appendix S3. Quality Assessment using Newcastle Ottawa Scale

#### Cardiovascular Disease

| Reference<br>(year). Country.                  | Representativeness<br>of the exposed<br>cohort | Selection of the<br>non-exposed<br>cohort              | Ascertainment<br>of exposure | Demonstration<br>that outcome of<br>interest was not<br>present at start<br>of study | Comparability of<br>cohorts on the<br>basis of the<br>design or<br>analysis | Assessment<br>of outcome | Was<br>follow-up<br>long<br>enough for<br>outcomes<br>to occur | Adequacy of<br>follow-up of<br>cohorts  | Additional Bias                                                                                               |
|------------------------------------------------|------------------------------------------------|--------------------------------------------------------|------------------------------|--------------------------------------------------------------------------------------|-----------------------------------------------------------------------------|--------------------------|----------------------------------------------------------------|-----------------------------------------|---------------------------------------------------------------------------------------------------------------|
| Bhattacharya S,<br>et al. <sup>15</sup> (2015) | A*                                             | A*                                                     | A*                           | A*                                                                                   | B*                                                                          | B*                       | A*                                                             | C                                       | Large portion of<br>original cohort<br>not included as<br>only one<br>measure of<br>maternal weight<br>taken. |
| Scotland                                       | All registered births                          | Categories of<br>Gestational<br>Weight Gain<br>defined | Secure record                | Records from<br>birth                                                                | Adjusts for<br>clustering, not<br>for<br>environmental<br>differences       | record<br>linkage        | 46 years                                                       | 47% loss, no<br>explanation for<br>3852 |                                                                                                               |
| Bygren LO, et<br>al. <sup>20</sup> (2000).     | A*                                             | B*                                                     | B                            | A*                                                                                   | B*                                                                          | B*                       | A*                                                             | B                                       |                                                                                                               |
|                                                | Taken from all                                 | Taken from                                             | Based on                     | Records from                                                                         | Adjustment for                                                              | Mixed                    | 70 years                                                       | Only 53% of                             | Assumed                                                                                                       |

|                                           |                                                |                              |                                      |                     |                                                                                   |                                             |                      |                                                                                     |                                                                                                      |
|-------------------------------------------|------------------------------------------------|------------------------------|--------------------------------------|---------------------|-----------------------------------------------------------------------------------|---------------------------------------------|----------------------|-------------------------------------------------------------------------------------|------------------------------------------------------------------------------------------------------|
| Sweden                                    | births                                         | historical records           | historical references of crop supply | birth               | age and civil status                                                              | recording/terminology on death certificates |                      | mortality cases had a specified cause                                               | exposure, cannot fully control for other risk factors.                                               |
| Eriksson JG, et al. <sup>16</sup> (2011). | A*                                             | A*                           | A*                                   | A*                  | B*                                                                                | A*                                          | A*                   | A*                                                                                  | Low numbers within each measure of birthweight according to mothers BMI.                             |
| Finland                                   | Helsinki Birth Cohort- all births from 1932-44 | Taken from same cohort       | Maternal hospital records            | Records from birth  | Adjustment for social class not adult lifestyle, body weight                      | Hospital admissions and records             | Median age 0.8 years | Representative of whole cohort                                                      |                                                                                                      |
| Reynolds RM, et al. <sup>14</sup> (2013). | A*                                             | A*                           | A*                                   | B*                  | B*                                                                                | A*                                          | A*                   | B*                                                                                  | Cannot fully control for shared genetic and postnatal lifestyle influences in childhood or adulthood |
| United Kingdom                            | All birth records                              | Matched from same population | ANC clinic visits in database        | Followed from birth | Adjusted for maternal age at delivery, gestation when weight was measured, social | Hospital records                            | 34-61 years          | Convenient sample from database. Only 49% of exposed cohort, 40% non exposed cohort |                                                                                                      |

|                                           |                           |                              |                                       |                     |                                                                                                     |                      |             |                              |                                                                                                            |
|-------------------------------------------|---------------------------|------------------------------|---------------------------------------|---------------------|-----------------------------------------------------------------------------------------------------|----------------------|-------------|------------------------------|------------------------------------------------------------------------------------------------------------|
|                                           |                           |                              |                                       |                     | class, parity, sex of offspring, gestation at delivery, birth weight, and current age of offspring. |                      |             | assessed                     | behavioural risks.                                                                                         |
| Painter RC, et al. <sup>19</sup> (2006)   | A*                        | B                            | B*                                    | A*                  | B*                                                                                                  | A*                   | A*          | C                            | Selective participation of persons who were fit enough to attend the clinic, may underestimate the effect. |
|                                           | Dutch Famine birth Cohort | Matched from same population | Based on location and timing of birth | Followed from birth | Adjusted for gender, size at birth, BMI, smoking, SES                                               | Hospital examination | 50-58 years | only 49% of cohorts assessed |                                                                                                            |
| Eriksson JG, et al. <sup>18</sup> (2014). | A*                        | A*                           | A*                                    | A*                  | A*                                                                                                  | A*                   | A*          | A*                           | Not adjusted for offspring adult                                                                           |
|                                           | Helsinki Birth            | National                     | Maternal height                       | Followed from       | Adjusted for                                                                                        | Hospital             | 70+ years   | Full sample                  |                                                                                                            |



|                                                             |                                     |                                        |                                     |                     |                                                                                                              |                    |              |               |                                                      |
|-------------------------------------------------------------|-------------------------------------|----------------------------------------|-------------------------------------|---------------------|--------------------------------------------------------------------------------------------------------------|--------------------|--------------|---------------|------------------------------------------------------|
| Finland                                                     | Cohort- all births from 1932-44     | statistics                             | and weight recorded before delivery | birth               | gender, year of birth, socioeconomic status in childhood and adult life, educational attainment, and income. | records            |              | evaluated     | lifestyle.                                           |
| Van Abeelen AF, et al. <sup>21</sup> (2012).<br>Netherlands | A*                                  | A*                                     | B*                                  | A*                  | B*                                                                                                           | A*                 | A*           | A*            | Not adjusted for offspring behavioural risk factors. |
|                                                             | Dutch Famine Birth Cohort           | Unexposed subjects from same community | Location of birth                   | Followed from birth | Adjusted for gender, date of birth, birth weight                                                             | Hospital records   | Same methods | 88%           |                                                      |
| Ekamper P, et al. <sup>22</sup> (2015).                     | A*                                  | A*                                     | B*                                  | A*                  | A*                                                                                                           | A*                 | A*           | A*            | No information on smoking patterns<br>Women not      |
|                                                             | All surviving males of Dutch Winter | Random sample of same population born  | Based on location of birth          | Followed from birth | Adjusted for time and place                                                                                  | National mortality | 63 years     | All available |                                                      |

|                                           |               |                                                                                 |                        |                                                        |                       |                                         |                     |                 |                                                                                                         |
|-------------------------------------------|---------------|---------------------------------------------------------------------------------|------------------------|--------------------------------------------------------|-----------------------|-----------------------------------------|---------------------|-----------------|---------------------------------------------------------------------------------------------------------|
| Netherlands                               | Famine Cohort | outside of<br>famine area                                                       |                        |                                                        | of birth              | records                                 |                     |                 | included.                                                                                               |
| Forsen T, et al. <sup>17</sup><br>(1997). | A*            | A*                                                                              | A*                     | A*                                                     | B*                    | A*                                      | A*                  | A*              | Geographically<br>restricted and<br>conducted in an<br>area with lower<br>CHD than<br>national average. |
|                                           | Finland       | Men born in<br>Helsinki University<br>Central Hospital<br>between 1924-<br>1933 | National<br>statistics | Hospital records<br>of maternal<br>weight at<br>labour | Records from<br>birth | Not controlled<br>for SES, adult<br>BMI | National<br>records | Same<br>methods |                                                                                                         |

## Type 2 Diabetes Mellitus

| Reference<br>(year).<br>Country. | Representativeness<br>of the sample | Sample Size | Non-<br>respondents | Ascertainment of<br>Exposure | Comparability of<br>outcome groups | Assessment<br>of outcome | Statistical<br>test | Additional Bias               |
|----------------------------------|-------------------------------------|-------------|---------------------|------------------------------|------------------------------------|--------------------------|---------------------|-------------------------------|
| Ly, Y et al                      | A*                                  | A*          | A*                  | B*                           | B*                                 | B*                       | A*                  | Assumption that the residents |

|                                                                                |                                          |                                               |                                                                                                                        |                                                                                      |                                                                             |                               |     |                                                                                                                            |
|--------------------------------------------------------------------------------|------------------------------------------|-----------------------------------------------|------------------------------------------------------------------------------------------------------------------------|--------------------------------------------------------------------------------------|-----------------------------------------------------------------------------|-------------------------------|-----|----------------------------------------------------------------------------------------------------------------------------|
| <sup>23</sup> (2010).<br><br>China<br><br>Cross Sectional                      | Taken from national survey               | Justified and satisfactory                    | >90% in the majority of villages                                                                                       | Recorded birth location                                                              | Adjusted for PA, alcohol, smoking, family history, age and sex but not diet | Validated diagnosis with T2DM | Yes | were born in the same area they lived. Those exposed to famine during gestation were likely exposed during childhood also. |
| Stanner et al<br><br><sup>24</sup> (1997)<br><br>Russia<br><br>Cross Sectional | B*                                       | B                                             | A*                                                                                                                     | B                                                                                    | B*                                                                          | A*                            | A*  | Only 44% of subjects analysed                                                                                              |
| Record linkage based on Society of Children of the Siege (birth register)      | Only 44% of identified subjects included | Born in same time period outside of Leningrad | half of controls invited from kerotomy clinic, though no significant differences found these results were not reported | Control differences may be apparent but controlled for sex, obesity, smoking and CHD | Secure record- birth registration                                           | Yes                           |     |                                                                                                                            |
| Turner S, et                                                                   | A*                                       | A*                                            | A*                                                                                                                     | B*                                                                                   | B*                                                                          | A*                            | A*  |                                                                                                                            |

|                                                                              |                                                              |                                      |                                                             |                                                                      |                                                                                                    |                                          |               |                                                                                               |
|------------------------------------------------------------------------------|--------------------------------------------------------------|--------------------------------------|-------------------------------------------------------------|----------------------------------------------------------------------|----------------------------------------------------------------------------------------------------|------------------------------------------|---------------|-----------------------------------------------------------------------------------------------|
| al. <sup>29</sup> (2013).<br><br>Austria<br><br>Cross Sectional              | Whole nation sample                                          | Justified and satisfactory           | All Austrian patients included                              | Recorded birth location                                              | Adjusted for date of birth, residency, and sex of the subjects. Not adult behavioural risk factors | Diagnosed and treated diabetes           | Yes           |                                                                                               |
| Lumey, LH et al. <sup>28</sup> (2015).<br><br>Ukraine<br><br>Cross sectional | A*<br><br>All diagnosed diabetics on Ukraine register        | A*<br><br>Justified and satisfactory | A*<br><br>Selected from matched areas not exposed to famine | B*<br><br>Non validated method but methods comprehensively described | B*<br><br>Adjusted for gender, but not for adult factors                                           | A*<br><br>Diagnosed and treated for T2DM | A*<br><br>Yes | Potential biased by differences in survival or loss to follow-up in specific exposure groups. |
| Dabelea D, et al. <sup>31</sup> (2008).<br><br>USA                           | B*<br><br>Sample of early T2DM cases taken from two networks | B<br><br>Convenient sample           | A*<br><br>Selected from primary care offices in same        | A*<br><br>Confirmed non-diabetics                                    | A*<br><br>Adjusted for perinatal and SES factors                                                   | D<br><br>self report of weight           | A*<br><br>Yes | Recall bias in maternal obesity possible. Only 54% case and 49% control sample involvement    |

|              |                          |  |        |  |  |  |  |  |
|--------------|--------------------------|--|--------|--|--|--|--|--|
| Case Control | of health care providers |  | region |  |  |  |  |  |
|--------------|--------------------------|--|--------|--|--|--|--|--|

| Reference (year). Country.                         | Representativeness of the exposed cohort | Selection of the non-exposed cohort | Ascertainment of exposure                                 | Demonstration that outcome of interest was not present at start of study | Comparability of cohorts on the basis of the design or analysis              | Assessment of outcome | Was follow-up long enough for outcomes to occur | Adequacy of follow-up of cohorts                    | Additional Bias                                      |
|----------------------------------------------------|------------------------------------------|-------------------------------------|-----------------------------------------------------------|--------------------------------------------------------------------------|------------------------------------------------------------------------------|-----------------------|-------------------------------------------------|-----------------------------------------------------|------------------------------------------------------|
| Fall CH, et al. <sup>30</sup> (1998).<br><br>India | B*                                       | A*                                  | B*                                                        | A*                                                                       | B*                                                                           | A*                    | A*                                              | C*                                                  | Limited power, small sample                          |
|                                                    | Small sample from one hospital           | From same sample                    | Maternal weight measured at different stages of pregnancy | Followed from birth                                                      | Adjusted for age, sex and BMI. Not family history or adult lifestyle factors | Diagnosed T2DM        | 39-60 years                                     | Only 40% had maternal weight measurements available |                                                      |
| Hult M, et al. <sup>25</sup> (2010).               | B*                                       | A*                                  | B*                                                        | B                                                                        | B*                                                                           | A*                    | A*                                              | B*                                                  | Limited to Igbo ethnicity. Lack of birth weight data |
|                                                    | Selection of                             | From same                           | Place and year                                            | Sample                                                                   | Adjusted for BMI                                                             | Diagnosed             | 37-43                                           | 90% of                                              |                                                      |

|         |                                                    |                                     |                                       |                       |                               |      |  |                     |                                                                   |
|---------|----------------------------------------------------|-------------------------------------|---------------------------------------|-----------------------|-------------------------------|------|--|---------------------|-------------------------------------------------------------------|
| Nigeria | participants from shops in six major market places | population, born in different years | of birth used as a proxy for exposure | selection may be bias | not gender or adult lifestyle | T2DM |  | approached subjects | and the inability to separate effects of fetal and infant famine. |
|---------|----------------------------------------------------|-------------------------------------|---------------------------------------|-----------------------|-------------------------------|------|--|---------------------|-------------------------------------------------------------------|

### Cancer

| Reference (year).<br>Country.       | Representativeness of the exposed cohort  | Selection of the non-exposed cohort | Ascertainment of exposure  | Demonstration that outcome of interest was not present at start of study | Comparability of cohorts on the basis of the design or analysis | Assessment of outcome      | Was follow-up long enough for outcomes to occur | Adequacy of follow-up of cohorts | Additional Bias                          |
|-------------------------------------|-------------------------------------------|-------------------------------------|----------------------------|--------------------------------------------------------------------------|-----------------------------------------------------------------|----------------------------|-------------------------------------------------|----------------------------------|------------------------------------------|
| Aschim EL, et al. (2005).<br>Norway | A*                                        | A*                                  | A*                         | A*                                                                       | A*                                                              | B                          | A*                                              |                                  | maternal weight only measured a few days |
|                                     | Clinical diagnosis with testicular cancer | Large sample from national hospital | All men without testicular | Confirmed testicular cancer free                                         | All men from national sample                                    | Weight measured a few days | Matched measurement                             |                                  |                                          |

| Cross-sectional                                                 |                                 |                                                | cancer                                  |                        |                                                     | before birth              |                                    |                                                       | before                                              |
|-----------------------------------------------------------------|---------------------------------|------------------------------------------------|-----------------------------------------|------------------------|-----------------------------------------------------|---------------------------|------------------------------------|-------------------------------------------------------|-----------------------------------------------------|
| Reference (year).<br>Country.                                   | Is the case definition adequate | Representativeness of cases                    | Selection of controls                   | Definition of controls | Comparability of cases and controls                 | Ascertainment of exposure | Ascertainment of exposure-controls | Non-response rate                                     |                                                     |
| Painter RC, et al. <sup>19</sup><br>(2006).<br><br>Netherlands  | A*                              | A*                                             | B*                                      | A*                     | A*                                                  | A*                        | A*                                 | B                                                     | Low power and relatively young cohort.              |
|                                                                 | Women from Dutch Famine Cohort  | Same population born outside of famine periods | Place and year of birth used as a proxy | Followed from birth    | Adjusted for adult, birth and maternal risk factors | Diagnosed breast cancer   | 57-59 years                        | Only 62% of eligible women in the cohort participated |                                                     |
| Van Abeelen AF, et al. <sup>21</sup> (2012).<br><br>Netherlands | A*                              | A*                                             | B*                                      | A*                     | B*                                                  | A*                        | A*                                 | A*                                                    | Not adjusted for offspring behavioural risk factors |
|                                                                 | Dutch Famine Birth Cohort       | Unexposed subjects from same community         | Location of birth                       | Followed from birth    | Adjusted for gender, date of birth, birth weight    | Hospital records          | Same methods                       | 88%                                                   |                                                     |
| Sanderson M, et al. <sup>33</sup><br>(1998).                    | A*                              | A*                                             | A*                                      | A*                     | A*                                                  | B*                        | A*                                 | C                                                     | Interview of mothers                                |
|                                                                 | Diagnosed breast                | Representative                                 | Age matched                             | No history of          | Adjusted for                                        | Structured                | Same as Cases                      | Only 53.9%                                            |                                                     |

|              |        |                 |                    |         |                                                                                                                                                    |           |  |                                                                            |                                                                                          |
|--------------|--------|-----------------|--------------------|---------|----------------------------------------------------------------------------------------------------------------------------------------------------|-----------|--|----------------------------------------------------------------------------|------------------------------------------------------------------------------------------|
| USA          | cancer | series of cases | community controls | disease | age, birth year, family history, age of menarche, menopausal status, pregnancies, oral contraceptive use, BMI, maternal age, smoking, birthweight, | interview |  | of living cases, 28% deceased cases and 50.3% of control mothers responded | conducted years after pregnancy. Potential selection bias, and low of statistical power. |
| Case Control |        |                 |                    |         |                                                                                                                                                    |           |  |                                                                            |                                                                                          |

COPD

| Reference (year). | Representativeness of the exposed | Selection of the non- | Ascertainment of exposure | Demonstration that outcome | Comparability of cohorts on | Assessment of outcome | Was follow-up | Adequacy of follow-up of | Additional Bias |
|-------------------|-----------------------------------|-----------------------|---------------------------|----------------------------|-----------------------------|-----------------------|---------------|--------------------------|-----------------|
|-------------------|-----------------------------------|-----------------------|---------------------------|----------------------------|-----------------------------|-----------------------|---------------|--------------------------|-----------------|



| Country.                              | cohort                                | exposed cohort                            |                                                  | of interest was not present at start of study | the basis of the design or analysis                                                            |                                                      | long enough for outcomes to occur | cohorts            |                                                      |
|---------------------------------------|---------------------------------------|-------------------------------------------|--------------------------------------------------|-----------------------------------------------|------------------------------------------------------------------------------------------------|------------------------------------------------------|-----------------------------------|--------------------|------------------------------------------------------|
| Hansen S, et al. <sup>34</sup> (2015) | A*                                    | B                                         | A*                                               | A*                                            | B*                                                                                             | B*                                                   | A*                                | C                  | relied on a single 25(OH) D measurement, which might |
| Denmark                               | Danish Fetal Origins Cohort 1988-1989 | Mothers with no vitamin D level available | Blood serum samples in 3 <sup>rd</sup> Trimester | Followed from birth                           | Adjusted for self reported maternal education, pre-pregnancy BMI, smoking and offspring height | Clinical examination (n-410) and self report (n-641) | 20 years                          | Only 70% of cohort |                                                      |
